1 *Original article*

2

3 **Validation of the Panbio™ COVID-19 Antigen Rapid Test (Abbott) to screen for SARS-**  
4 **CoV-2 infection in Sint Maarten: a diagnostic accuracy study**

5

6 **Authors:** Colin King<sup>1</sup>, Eva Lista-de Weever<sup>1</sup>, Maria Henry<sup>1</sup>, Radjin Steingrover, PhD<sup>2</sup>,

7 Chérina Fleming, PhD<sup>2</sup>, Richard Pannefle<sup>3</sup>, Sanne van Kampen, PhD<sup>1</sup> \*

8

9 **Affiliations:**

- 10 1. Collective Prevention Services, Ministry of Health, Social Development and Labor, Sint  
11 Maarten
- 12 2. Department of Microbiology, St Maarten Laboratory Services, Sint Maarten
- 13 3. Ministerial Office, Ministry of Health, Social Development and Labor, Sint Maarten

14

15 **\*Corresponding author:**

16 Dr. Sanne Christine van Kampen

17 Collective Prevention Services

18 Ministry of Health, Social Development and Labor

19 W.G. Buncamper Road 33, Vineyard Building

20 Philipsburg, Sint Maarten

21 Email: [Sanne.vankampen@sintmaartengov.org](mailto:Sanne.vankampen@sintmaartengov.org)

22 Telephone: +17215249361

23

24 **Word count:** 2,335

25

26 **Abstract**

27 Objectives: Control of the pandemic has required countries to look for other forms of tests  
28 besides the gold standard real-time polymerase chain reaction (RT-PCR). Rapid antigen tests  
29 (RAT), though less sensitive than RT-PCR, offer the possibility of rapid, inexpensive and  
30 early detection of the most infectious COVID-19 cases. Only very few studies have assessed  
31 the performance of the Abbott Panbio COVID-19 RAT among asymptomatic people or in  
32 Latin America. This study set out to validate this test among people attending the public test  
33 street in Sint Maarten, Dutch Caribbean.

34

35 Methods: People of all ages were recruited from the public COVID-19 test street regardless of  
36 COVID-19 symptoms. They received a nasopharyngeal swab for the Abbott Panbio COVID-  
37 19 RAT and the RT-PCR Qtower. Diagnostic accuracy of the RAT was compared to the RT-  
38 PCR among the overall study population and for subgroups with/without symptoms,  
39 with/without close contact and different Ct values.

40

41 Results: Using a RT-PCR Ct cut-off value of <33, 119 out of 1,411 people (8.4%) tested  
42 positive for SARS-CoV-2. Most were asymptomatic (59%). The overall sensitivity and  
43 specificity of the RAT was 84% (95% CI 76.2-90.1) and 99.9% (95% CI 99.6-100) respectively.  
44 The sensitivity reduced to 67.6% (95% CI: 49.5%, 82.6%) among people without symptoms,  
45 regardless of whether they were in close contact with a known COVID-19 case. Sensitivity  
46 reduced considerably with a Ct cut-off value of <35.

47

48 Conclusions: The Abbott Panbio RAT is a valid and cheaper alternative to RT-PCR when  
49 used on symptomatic individuals among the general population. However, among

50 asymptomatic people it should not be used as a stand-alone test and negative results should be  
51 confirmed with RT-PCR .

52

53 **Introduction**

54 Adequate and rapid diagnostics are essential for the treatment and control of COVID-19.<sup>1</sup>

55 The gold standard test to detect the SARS-CoV-2 virus is real-time polymerase chain reaction  
56 (RT-PCR), a molecular assay targeting specific viral DNA.<sup>2</sup> In Sint Maarten, the public health  
57 authorities use RT-PCR for SARS-CoV-2 testing to identify current infections in individuals  
58 with signs or symptoms consistent with COVID-19. This testing is also used when an  
59 asymptomatic person has been in contact with a SARS-CoV-2 positive case or identified by a  
60 positive person through contact tracing.

61

62 While RT-PCR has optimal sensitivity and specificity to detect SARS-CoV-2, it is an  
63 expensive technique that can only be performed in well-equipped laboratories with trained  
64 laboratory staff. Control of the pandemic has required countries to look for other forms of  
65 tests besides the standard RT-PCR. Rapid antigen tests (RAT), though less sensitive than RT-  
66 PCR, offer the possibility of rapid, inexpensive and early detection of the most infectious  
67 COVID-19 cases in appropriate settings.<sup>3</sup> RATs generally use an immunological lateral flow  
68 assay to detect SARS-CoV-2 viral antigens.<sup>4</sup> RATs would be an appropriate alternative to  
69 RT-PCR for many settings considering it would reduce the pressure on laboratories, while  
70 also expanding testing capacity. A recent study from the Netherlands and Aruba found that  
71 the Abbott Panbio COVID-19 RAT had a sensitivity of 87.4% and a specificity of 100%  
72 among symptomatic people.<sup>5</sup> Only very few studies have assessed the performance of the  
73 Abbott Panbio COVID-19 RAT among asymptomatic people or in Latin America and the  
74 Carribean.<sup>6 7</sup>

75

76 This study set out to compare the Abbott Panbio COVID-19 RAT to the standard molecular  
77 diagnostic assay RT-PCR among people who attended the public COVID-19 test street in Sint  
78 Maarten, Dutch Caribbean, regardless of symptoms.

79

## 80 **Methods**

81

### 82 *Study population and period*

83 The study population consisted of people from the community of Sint Maarten, of all ages,  
84 who voluntarily came to the public test street to receive a COVID-19 test. Participants were  
85 enrolled from the 11th of January 2021 until the minimal required sample size was reached.

86 All persons were given verbal information about the testing procedure and were asked for  
87 consent to participate in the study. Each person was tested with one nasopharyngeal swab for  
88 RT-PCR and another nasopharyngeal swab for RAT by trained public health personnel.

89 People who did not receive two nasopharyngeal swabs, who tested positive for COVID-19 in  
90 the past three months or did not consent to participate were not included in the study.

91

### 92 *Diagnostic tests*

#### 93 RT-PCR test

94 The RT-PCR samples were sent to St Maarten Laboratory Services that operates an in-house  
95 open PCR assay using a Q-tower amplification system targeting the SARS-CoV-2 E-gene.

96 Laboratory staff was trained on this system and the system was validated by the National  
97 Institute for Public Health and the Environment of the Netherlands (RIVM). Amplification is  
98 cut off at 35 cycles.

99

#### 100 Rapid Antigen Test

101 The RAT selected was the Panbio Abbott COVID-19 Rapid Antigen Test. This is an  
102 immunofluorescence-based lateral flow assay that can detect SARS-CoV-2 antigens within  
103 15-30 minutes. This test fits the WHO criteria (sensitivity of  $\geq 80\%$ , specificity of  $\geq 97\%$ )<sup>8</sup> and  
104 has been validated in the Netherlands among symptomatic persons.

105

#### 106 *Sample size calculation*

107 Based on Buderer *et al.*,<sup>9</sup> a minimal required sample size was calculated to accurately  
108 estimate the sensitivity and specificity of the RAT with a significance level of 5%. With an  
109 estimated sensitivity of 80% and specificity of 97% (WHO's minimum requirements) and a  
110 low estimated prevalence of disease of 5%, a minimum sample size of 1,230 participants was  
111 estimated to provide a precision of 0.1 for the sensitivity's and specificity's 95% confidence  
112 interval.

113

#### 114 *Analysis*

115 Data was collected on demographics, clinical information and test results. Demographics  
116 included contact details, age, sex, occupation, and house doctor. Clinical information included  
117 COVID-19 symptoms, whether someone had been in close contact with a confirmed COVID-  
118 19 patient and the last date of contact. Test results included results from the RT-PCR and  
119 RAT tests. Participants with indeterminate or missing results were excluded from the study.  
120 The study only collected personal data that was already routinely collected when people  
121 attend the public health test street.

122

123 Participant characteristics were compared between people that tested positive and negative for  
124 COVID-19 with RT-PCR. Differences in terms of age, sex, symptoms and close contact

125 between both groups were assessed using Pearson Chi-square tests (for proportions) and t-  
126 tests (for means) using a significance level of  $p=0.05$ .

127

128 To evaluate the accuracy of the Abbott Panbio COVID-19 RAT, RT-PCR was used as a  
129 reference test to calculate the sensitivity, specificity, positive and negative predictive values  
130 (PPV, NPV) with their confidence intervals at 95%. In this analysis, RT-PCR results were  
131 considered positive if the cycle threshold (Ct) value for amplification of the E-gene was  
132 below 33 cycles; and participants missing Ct values were removed. The clinical performance  
133 of the RAT was stratified by asymptomatic and symptomatic persons as well as by people  
134 with and without close contact to someone with COVID-19. Furthermore, a sensitivity  
135 analysis of RAT accuracy was done using various Ct cut-off values for a positive PCR result.  
136 All statistical calculations were performed in Stata and SPSS.

137

### 138 *Ethical approval*

139 Ethical approval was requested from the Sint Maarten Medical Center (SMMC) Medical Ethics  
140 Committee, who decided that ethical oversight was not required for this study.

141

## 142 **Results**

143

### 144 *Population characteristics*

145 From the 11th of January 2021 to the 26th of February 2021 a total of 1,507 participants were  
146 recruited through the public health test street. Thirty participants (2%) had one or two missing  
147 test results and were excluded from analysis.

148

149 Of the 1,477 individuals included in the study, the median age was 40.5 years (SD 16), most  
150 were female (59%), asymptomatic (59%) and had had no close contact with someone with  
151 COVID-19 (60%) (Table 1). Most commonly reported symptoms were headache (17%), cough  
152 (17%), runny/stuffy nose (17%), and sore throat (15%).

153

154 A total of 202 (14%) participants tested positive for SARS-CoV-2 with RT-PCR. Among them,  
155 the median age was 42.3 years (SD 16.2), most were female (65%) and had had no close contact  
156 (62%). An impressive 69% of positive participants reported symptoms. Symptoms significantly  
157 associated with testing positive for SARS-CoV-2 were fever, cough, loss of taste or smell, body  
158 ache (all  $p < 0.00001$ ) as well as runny/stuffy nose, headache, fatigue and shortness of breath (all  
159  $p < 0.05$ ). Age and having been in close contact with a known COVID-19 case were unrelated.

160

#### 161 *Diagnostic accuracy*

162 For the accuracy analysis, 66 participants were excluded because they had missing RT-PCR Ct  
163 values. Of 1,411 people tested, 119 (8%) were positive by RT-PCR and 101 (7%) by RAT;  
164 1,292 (92%) were negative by RT-PCR and 1,310 (93%) by RAT (Table 2). This resulted in an  
165 overall performance of the RAT with a sensitivity of 84.0%, specificity of 99.9%, PPV of 99.9%  
166 and NPV of 98.5% (Table 3). Among people with symptoms, 15% were positive for COVID-  
167 19 by RT-PCR and the RAT had an increased sensitivity of 91%. Among people without  
168 symptoms, only 4% had COVID-19 and the sensitivity of the RAT decreased to 67.7%. The  
169 performance of the RAT did not change when asymptomatic people had had close contact with  
170 a known COVID-19 case. All subgroups had a specificity of at least 99.7%; a NPV of at least  
171 98%; and PPV of at least 91.7%.

172

#### 173 *Sensitivity analyses*

174 The diagnostic accuracy of the RAT compared to RT-PCR was analysed for Ct values of below  
175 35, 30 and 25 (Table 4). Test sensitivity decreased as the Ct cut-off value increased. Especially  
176 when a Ct cut-off value of below 35 was used, meaning that samples with very low viral load  
177 were still considered positive, the sensitivity of the RAT decreased drastically. Specificity was  
178 at least 98.7% for all Ct cut-of values.

179

## 180 **Discussion**

181 This study found that among the general public of Sint Maarten, the Abbott Panbio COVID-  
182 19 RAT identified SARS-CoV-2 infected subjects with an overall sensitivity of 84.0% and  
183 specificity of 99.9%. Most participants who attended the national test site were asymptomatic,  
184 and half of the asymptomatic people had been in close contact with a COVID-19 positive  
185 person. Compared to symptomatic people, the sensitivity was drastically lower among  
186 asymptomatic people (67.6%) and below the minimally recommended sensitivity of 80% for a  
187 RAT as recommended by WHO and far below the 90% as recommended by ECDC.<sup>10</sup> The  
188 NPV among this group remained at 98.7% due to the low prevalence of COVID-19. Although  
189 there were slight variations in the specificity for different subgroups, it always stayed above  
190 the recommended 97%.

191

192 The 84% overall sensitivity of the Abbott Panbio COVID-19 RAT estimated in this study was  
193 very similar to that found in studies using the same Ct cut-off value of <33. For example, two  
194 prospective studies in community testing sites in Switzerland and Germany found similar  
195 sensitivities of 89.7% and 88.3%, respectively.<sup>11</sup> Two studies in Spain that evaluated the  
196 Abbott Panbio RAT in primary health care centers reported lower overall sensitivities of  
197 71.4% and 79.6% respectively, which may be due to the higher Ct cut-off value used.<sup>12 13</sup> A  
198 real-life validation of the Abbott Panbio RAT in the Netherlands found higher sensitivities of

199 95.2% at the study site in Utrecht and 98% in Aruba. This was a result of testing only  
200 symptomatic people and using a lower Ct threshold for positive results. A recent study in the  
201 Netherlands focused specifically on asymptomatic football players found an overall  
202 sensitivity of 66.7%, which is very similar to the asymptomatic results from our study  
203 (67.6%).<sup>14</sup> Despite the differences in sensitivity of the different studies, all had a specificity of  
204 over 99%.

205

206 One strength of our study is that it is one of the first COVID-19 diagnostic accuracy studies in  
207 the Caribbean, which provides insights into the potential performance of the Abbott Panbio  
208 RAT for other Caribbean islands. The findings can also help different islands to decide on  
209 how to best incorporate this test into their COVID-19 screening and diagnostic algorithms.  
210 Furthermore, this is one of the first studies to specifically include an analysis of asymptomatic  
211 participants and showed that it has low accuracy among this group. This may help countries to  
212 prioritize this test for symptomatic people – especially those with fever, cough, loss of taste or  
213 smell and body ache – and thereby ensure early detection and fast contact tracing of COVID-  
214 19 cases.

215

216 One limitation of this study was that it was unable to follow up persons before or after their  
217 test result. It is thus unknown whether PCR-positive persons were in the early or late stage of  
218 their infection and how the Abbott RAT performed in identifying people in their most  
219 contagious period. Further, symptoms were self-reported and may have been over- or  
220 underreported, which could have biased the difference in sensitivity between symptomatic  
221 and asymptomatic individuals.

222

223 One main implication of this study is that the Abbott RAT is not beneficial as a stand-alone  
224 test for asymptomatic people as it will miss approximately one out of three people with  
225 COVID-19 in this subgroup. The results show that approximately one out of ten positive  
226 individuals with symptoms will not be spotted with the RAT, which makes it an acceptable  
227 alternative for this subgroup. These findings confirm that COVID-19 RATs perform better  
228 among people with higher viral loads.<sup>15</sup> Based on these findings, the public health authorities  
229 in Sint Maarten decided to perform the Abbott Panbio RAT among symptomatic people only,  
230 while remaining to test all people attending the test street regardless of symptoms with RT-  
231 PCR.

232

233 In conclusion, the Abbott Panbio RAT is a valid and cheaper alternative to RT-PCR for  
234 detecting COVID-19 when used on symptomatic individuals among the general population.  
235 Taking into consideration the low cost, user-friendliness, and turnaround time, this test would  
236 also be beneficial to identify clusters or outbreaks in specific settings when speed of results is  
237 of essence. However, among asymptomatic people the Abbott Panbio RAT should not be used  
238 as a stand-alone test and negative results should be confirmed with RT-PCR .

239

240 **Conflict of interest**

241 The authors declare to have no conflict of interest.

242

243 **Funding**

244 The Abbott Panbio COVID-19 Rapid Antigen Tests were donated by the Ministry of Health,  
245 Wellbeing and Sports of the Netherlands, for the purpose of this study. No other external  
246 funding was received.

247

248 **Acknowledgements**

249 The authors would like to thank the staff and volunteers of the testing team at the Department  
250 of Collective Prevention Services of the Ministry of Health, Social Development and Labor of  
251 Sint Maarten for conducting data collection and field testing with the Abbott Panbio COVID-  
252 19 Rapid Antigen Test.

253

254 **Access to data**

255 The full database is available upon reasonable request from the last author (SvK).

256

257 **Contributions**

258 SvK, EdW, MH and RP conceptualized the study. SvK, RS and CF designed the  
259 methodology. RS and CF conducted the laboratory tests. SvK and CK supported field testing  
260 and data collection. CK conducted data validation, cleaning and analysis. CK wrote the first

261 draft manuscript. SvK supervised all aspects of the study. All authors reviewed and edited the

262 final manuscript.

263

264

265 **Table 1. Population characteristics of enrolled participants by COVID-19 status**

| Variable                       | Number (%) <sup>1</sup> | COVID-19 RT-PCR + (%) | COVID-19 RT-PCR – (%) | X2 test (p-value) <sup>2</sup> |
|--------------------------------|-------------------------|-----------------------|-----------------------|--------------------------------|
| <b>Total</b>                   | 1,477 (100%)            | 202 (100)             | 1,275 (100)           | -                              |
| <b>Age in years (mean, SD)</b> | 40.5 (16.3)             | 42.3 (16.2)           | 40.2 (16.3)           | 0.0912                         |
| <b>Sex</b>                     |                         |                       |                       |                                |
| Male                           | 608 (41.3)              | 69 (34.7)             | 539 (42.3)            | 0.041064                       |
| Female                         | 864 (58.7)              | 130 (65.3)            | 734 (57.7)            | -                              |
| <b>Symptoms</b>                |                         |                       |                       |                                |
| No symptoms                    | 866 (59.2)              | 65 (32.3)             | 801 (63.5)            | <0.00001                       |
| With symptoms                  | 596 (40.8)              | 139 (69.2)            | 460 (36.5)            | -                              |
| Fever                          | 160 (10.9)              | 47 (23.4)             | 113 (9.0)             | <0.00001                       |
| Cough                          | 242 (16.6)              | 66 (32.8)             | 176 (14.0)            | <0.00001                       |
| Runny / stuffy nose            | 241 (16.5)              | 51 (25.4)             | 190 (15.1)            | 0.000255                       |
| Sore throat                    | 221 (15.1)              | 38 (18.9)             | 183 (14.5)            | 0.106348                       |
| Shortness of breath            | 44 (3.0)                | 11 (5.5)              | 33 (2.6)              | 0.027753                       |
| Loss of taste or smell         | 79 (5.4)                | 45 (22.4)             | 34 (2.7)              | <0.00001                       |
| Headache                       | 251 (17.2)              | 50 (24.9)             | 201 (15.9)            | 0.001808                       |
| Body ache                      | 132 (9.0)               | 44 (21.9)             | 88 (7.0)              | <0.00001                       |
| Nausea / vomiting              | 48 (3.3)                | 6 (3.0)               | 42 (3.3)              | 0.798434                       |
| Diarrhea                       | 38 (2.6)                | 6 (3.0)               | 32 (2.5)              | 0.711203                       |
| Fatigue / tiredness            | 99 (6.8)                | 22 (10.9)             | 78 (6.2)              | 0.01304                        |
| Other                          | 81 (5.5)                | 15 (7.5)              | 66 (5.2)              | 0.199571                       |
| <b>Close contact</b>           |                         |                       |                       |                                |
| Yes                            | 517 (40.2)              | 67 (38.1)             | 450 (40.5)            | 0.540245                       |
| No                             | 770 (59.8)              | 109 (61.9)            | 661 (59.5)            | -                              |

266 *Legend. RT-PCR: real-time polymerase chain reaction; X2: Chi-square; SD: standard*  
 267 *deviation. <sup>1</sup> Number of missing results by variable: age (7); sex (5); symptoms (15); close*  
 268 *contact (190). <sup>2</sup> For age, t-test was used.*

269  
 270 **Table 2. Diagnostics results among all participants (n=1,411) with PCR Ct cut-off of <33**

| RAT results (Abbott) | RT-PCR results (Q-tower) |          | Total |
|----------------------|--------------------------|----------|-------|
|                      | Positive                 | Negative |       |
| Positive             | 100                      | 1        | 101   |
| Negative             | 19                       | 1291     | 1310  |
| <b>Total</b>         | 119                      | 1292     | 1411  |

271 *Legend. RT-PCR: real-time polymerase chain reaction; RAT: rapid antigen test.*

272 **Table 3. Diagnostics results for different subgroups, with PCR positive results with a cycle threshold cut-off of <33**

| Participants       | n    | COVID-19 RT-PCR + | Prevalence (95%CI)    | Sensitivity (95%CI)   | Specificity (95%CI)  | PPV (95%CI)           | NPV (95%CI)           |
|--------------------|------|-------------------|-----------------------|-----------------------|----------------------|-----------------------|-----------------------|
| All participants   | 1411 | 119               | 8.4%<br>(7.0, 10.0)   | 84.0%<br>(76.2, 90.1) | 99.9%<br>(99.6, 100) | 99.0%<br>(93.4, 99.9) | 98.6%<br>(97.8, 99.0) |
| With symptoms      | 550  | 84                | 15.3%<br>(12.4, 18.6) | 90.5%<br>(82.1, 95.8) | 100%<br>(99.2, 100)  | 100%                  | 98.3%<br>(96.8, 99.1) |
| Without symptoms   | 846  | 34                | 4.0%<br>(2.8, 5.6)    | 67.7%<br>(49.5, 82.6) | 99.9%<br>(99.3, 100) | 95.8%<br>(76.2, 99.4) | 98.7%<br>(97.8, 99.2) |
| With close contact | 370  | 17                | 4.6%<br>(2.7, 7.3)    | 64.7%<br>(38.3, 85.8) | 99.7%<br>(98.4, 100) | 91.7%<br>(60.1, 98.8) | 98.3%<br>(96.9, 99.1) |
| No close contact   | 374  | 13                | 3.5%<br>(1.9, 5.9)    | 61.5%<br>(31.6, 86.1) | 100%<br>(99.0, 100)  | 100%                  | 98.6%<br>(97.3, 99.3) |

273 *Legend. RT-PCR: real-time polymerase chain reaction; CI: confidence interval.*

274

275 **Table 4. Diagnostic accuracy of rapid antigen test compared to RT-PCR with different Ct values as cut-off for positive results**

| RT-PCR positives | Number (%)  | Prevalence% (95% CI) | Sensitivity% (95% CI) | Specificity% (95% CI) |
|------------------|-------------|----------------------|-----------------------|-----------------------|
| Ct < 35          | 136 (100 %) | 9.6% (8.1, 11.3)     | 73.5% (65.3, 80.7)    | 99.9% (99.6, 100)     |
| Ct < 30          | 108 (79.4%) | 7.7% (6.3, 9.17)     | 90.7% (83.6, 95.5)    | 99.8% (99.3, 100)     |
| Ct < 25          | 86 (62.2%)  | 6.1% (4.9, 7.47)     | 97.7% (91.9, 99.7)    | 98.7% (98, 99.3)      |

276 *Legend. . RT-PCR: real-time polymerase chain reaction; CI: confidence interval; Ct: cycle threshold.*

---

<sup>1</sup> Dinnes J, Deeks JJ, Adriano A, Berhane S, Davenport C, Dittrich S, et al. Rapid, point-of-care antigen and molecular-based tests for diagnosis of SARS-CoV-2 infection. *Cochrane Database Syst Rev*. 2020 Aug 26;2020(8). <https://www.doi.org/10.1002/14651858.CD013705/full>

<sup>2</sup> Vandenberg O, Martiny D, Rochas O, et al. Considerations for diagnostic COVID-19 tests. *Nat Rev Microbiol*. 2020 Oct 14. <https://doi.org/10.1038/s41579-020-00461-z>

<sup>3</sup> World Health Organization. Antigen-detection in the diagnosis of SARS-CoV-2 infection using rapid immunoassays. Interim guidance, 11 September 2020. Available at: <https://www.who.int/publications/i/item/antigen-detection-in-the-diagnosis-of-sars-cov-2infection-using-rapid-immunoassays>

<sup>4</sup> Panbio COVID-19 Ag Rapid Test Device | Abbott Point of Care Testing. Available from: <https://www.globalpointofcare.abbott/es/product-details/panbio-COVID-19-ag-antigen-test.html>

<sup>5</sup> Bonten. COVID-19: hoe betrouwbaar zijn sneltesten? *Ned Tijdschr Geneeskd*. 2020;164:C4678. Available at: <https://www.ntvg.nl/artikelen/nieuws/COVID-19-hoe-betrouwbaar-zijn-sneltesten/volledig>

<sup>6</sup> Foundation for Innovative New Diagnostics (FIND). SARS-CoV-2 Diagnostics: Performance data. Available at: <https://www.finddx.org/COVID-19/dx-data/>

<sup>7</sup> Rapid antigen tests for the diagnosis of a SARS-CoV-2 infection. University of Heidelberg, Denmark, 2020. Available at: <https://www.klinikum.uni-heidelberg.de/diagnostics-global-health>

<sup>8</sup> World Health Organization. Advice on the use of point-of-care immunodiagnostic tests for COVID-19: scientific brief. 8 April 2020. Available at:

---

<https://www.who.int/publications/i/item/advice-on-the-use-of-point-of-care-immunodiagnostic-tests-for-COVID-19-scientific-brief>

<sup>9</sup> Buderer NM. Statistical methodology: I. Incorporating the prevalence of disease into the sample size calculation for sensitivity and specificity. *Acad Emerg Med.* 1996;3(9):895–900.

<sup>10</sup> European Commission. Current performance of COVID-19 test methods and devices and proposed performance criteria. Working document of Commission services. Created by GROW.R.2.DIR. 17 April 2020. Available at:

<https://ec.europa.eu/docsroom/documents/40805>

<sup>11</sup> FIND Evaluation of Abbott Panbio COVID-19 Ag Rapid Test Device External Report Version 2.1, 10 December 2020. Available at: [https://www.finddx.org/wp-](https://www.finddx.org/wp-content/uploads/2020/12/Panbio_Ag-Public-Report_v2.1.pdf)

[content/uploads/2020/12/Panbio\\_Ag-Public-Report\\_v2.1.pdf](https://www.finddx.org/wp-content/uploads/2020/12/Panbio_Ag-Public-Report_v2.1.pdf)

<sup>12</sup> Bulilete O, Lorente P, Leiva A, Carandell E, Oliver A, Rojo E et al. Evaluation of the Panbio™ rapid antigen test for SARS-CoV-2 in primary health care centers and test sites. *medRxiv* 2020. doi: <https://doi.org/10.1101/2020.11.13.20231316>

<sup>13</sup> Albert E, Torres I, Bueno F, Huntley D, Molla E, Fernández-Fuentes MÁ, Martínez M, Poujois S, Forqué L, Valdivia A, Solano de la Asunción C, Ferrer J, Colomina J, Navarro D. Field evaluation of a rapid antigen test (Panbio™ COVID-19 Ag Rapid Test Device) for COVID-19 diagnosis in primary healthcare centres. *Clin Microbiol Infect.* 2021 Mar;27(3):472.e7-472.e10. doi: 10.1016/j.cmi.2020.11.004.

<sup>14</sup> Winkel, BMF, Schram E, Gremmels H, Debast SB, Schuurman R, Wensing AMJ, Bonten MJM, Goedhart E, Hofstra, LM; Antigen Rapid Test Validation Group. Screening for SARS-CoV-2 infection in asymptomatic individuals using the Panbio COVID-19 Antigen Rapid Test (Abbott) compared to RT-qPCR. *medRxiv* 2020.

<https://doi.org/10.1101/2020.12.03.20243311>

---

<sup>15</sup> Beek JE , Igloi Z, Boelsums T, Fanoy E, Gotz H, Molenkamp R, Van Kampen J, Van Kessel CG, Van der Eijk A, Van de Vijver D, Koopmans M. medRxiv 2020.

<https://doi.org/10.1101/2020.10.13.20211524>
